# Supplementary material
Source: PubMed Central journal article supplement (PMC3707977)

**Figure E3.** Calibration plots showing mean risk of critical illness across deciles of predicted risk before and after adding a biomarker to the clinical model. *Black circles* correspond to mean expected risk, and *grey circles* to observed risk. Error bars are 95% confidence intervals derived from bootstrapping.

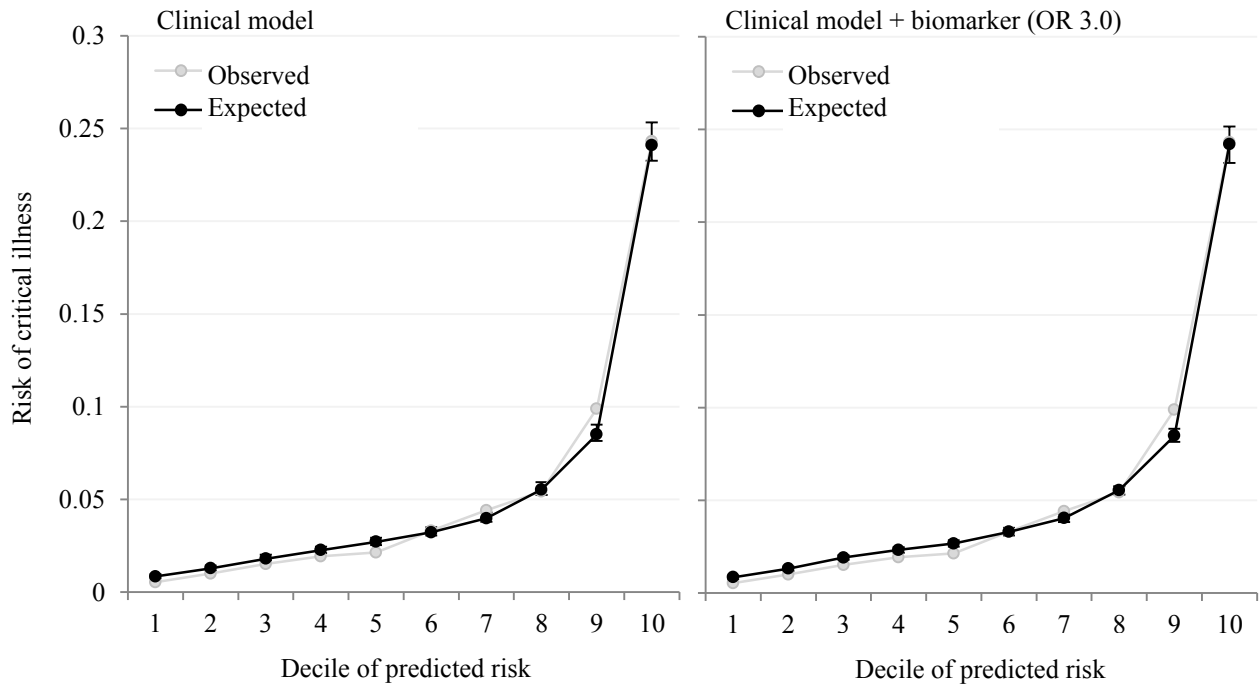

Supplement: NIHMS428098-supplement-03.pdf [file NIHMS428098-supplement-03.pdf]
