# Supplementary material
Source: PubMed Central journal article supplement (PMC3707977)
Supplement: NIHMS428098-supplement-05.pdf [file NIHMS428098-supplement-05.pdf]

**Table E3.** Overall performance measures for the clinical triage model and models which include a biomarker of increasing strength which is correlated with systolic blood pressure.

| <b>Odds ratio (OR) of biomarker</b> | <b>Area under the ROC curve (95% CI)</b> | <b>Integrated discrimination improvement (95%CI)</b> |
|-------------------------------------|------------------------------------------|------------------------------------------------------|
| <b>Clinical model</b>               | 0.81                                     | .                                                    |
| <b>1.5</b>                          | 0.81 (0.803, 0.818)                      | 0.004 (0.002, 0.006)                                 |
| <b>2.0</b>                          | 0.822 (0.814, 0.829)                     | 0.016 (0.013, 0.020)                                 |
| <b>2.5</b>                          | 0.834 (0.826, 0.842)                     | 0.032 (0.028, 0.037)                                 |
| <b>3.0</b>                          | 0.843 (0.837, 0.850)                     | 0.047 (0.042, 0.052)                                 |
| <b>3.5</b>                          | 0.854 (0.848, 0.861)                     | 0.065 (0.059, 0.072)                                 |
| <b>4.0</b>                          | 0.865 (0.859, 0.872)                     | 0.084 (0.076, 0.091)                                 |
| <b>4.5</b>                          | 0.874 (0.868, 0.880)                     | 0.102 (0.094, 0.110)                                 |
| <b>5.0</b>                          | 0.881 (0.876, 0.888)                     | 0.114 (0.106, 0.124)                                 |
| <b>5.5</b>                          | 0.888 (0.881, 0.893)                     | 0.131 (0.122, 0.141)                                 |
| <b>6.0</b>                          | 0.893 (0.888, 0.899)                     | 0.146 (0.137, 0.157)                                 |

^ The 95% confidence intervals for the AUC and IDI derive from 5<sup>th</sup> and 95<sup>th</sup> percentile after bootstrapping (1000 replications).
