# Supplementary material
Source: PubMed Central journal article supplement (PMC3707977)
Supplement: NIHMS428098-supplement-06.pdf [file NIHMS428098-supplement-06.pdf]

**Table E4.** Results from risk reclassification analysis, comparing models with biomarkers of increasing strength to a clinical model where correlation ( $\rho = -0.2$ ) is present between the biomarker and systolic blood pressure.

| <b>Odds ratio (OR) of biomarker</b> | <b>Overall NRI (95%CI)</b> | <b>NRI for cases (95%CI)</b> | <b>NRI for controls (95%CI)</b> |
|-------------------------------------|----------------------------|------------------------------|---------------------------------|
| <b>1.5</b>                          | 0.019 (0.008, 0.036)       | 0.020 (0.004, 0.038)         | 0.000 (-0.002, 0.002)           |
| <b>2.0</b>                          | 0.055 (0.041, 0.077)       | 0.057 (0.040, 0.079)         | -0.002 (-0.011, 0.010)          |
| <b>2.5</b>                          | 0.105 (0.088, 0.130)       | 0.104 (0.084, 0.129)         | 0.001 (-0.008, 0.012)           |
| <b>3.0</b>                          | 0.147 (0.129, 0.172)       | 0.141 (0.123, 0.166)         | 0.007 (-0.003, 0.017)           |
| <b>3.5</b>                          | 0.183 (0.167, 0.215)       | 0.169 (0.153, 0.199)         | 0.014 (0.005, 0.025)            |
| <b>4.0</b>                          | 0.223 (0.206, 0.252)       | 0.201 (0.185, 0.227)         | 0.022 (0.011, 0.033)            |
| <b>4.5</b>                          | 0.270 (0.250, 0.298)       | 0.240 (0.22, 0.266)          | 0.030 (0.020, 0.042)            |
| <b>5.0</b>                          | 0.288 (0.268, 0.317)       | 0.252 (0.233, 0.279)         | 0.036 (0.026, 0.048)            |
| <b>5.5</b>                          | 0.315 (0.294, 0.345)       | 0.273 (0.252, 0.299)         | 0.042 (0.031, 0.055)            |
| <b>6.0</b>                          | 0.340 (0.320, 0.371)       | 0.292 (0.273, 0.316)         | 0.048 (0.037, 0.063)            |

^ The 95% confidence intervals for the NRI using the bootstrap (1000 replications)
