# Supplementary material
Source: PubMed Central journal article supplement (PMC3707977)
Supplement: NIHMS428098-supplement-07.pdf [file NIHMS428098-supplement-07.pdf]

**Table E5.** Net reclassification results when comparing the clinical model to models with biomarkers of increasing strength (OR ranging from 1.5 to 6.0), and alternative parameterization of risk thresholds (<10%, 10-50%, >50%) and sample size of 10,000 subjects.

| <b>Odds ratio (OR) of biomarker</b> | <b>Overall NRI (95%CI)</b> | <b>NRI for cases (95% CI)</b> | <b>NRI for controls (95% CI)</b> |
|-------------------------------------|----------------------------|-------------------------------|----------------------------------|
| <b>1.5</b>                          | 0.007 (-0.024, 0.050)      | 0.007 (-0.025, 0.044)         | 0.003 (-0.006, 0.003)            |
| <b>2.0</b>                          | 0.072 (0.030, 0.126)       | 0.070 (0.026, 0.122)          | -0.002 (-0.014, 0.002)           |
| <b>2.5</b>                          | 0.072 (0.025, 0.135)       | 0.068 (0.017, 0.126)          | -0.004 (-0.015, -0.001)          |
| <b>3.0</b>                          | 0.131 (0.070, 0.184)       | 0.136 (0.079, 0.194)          | -0.005 (-0.017, -0.004)          |
| <b>4.5</b>                          | 0.178 (0.125, 0.235)       | 0.187 (0.138, 0.250)          | -0.009 (-0.025, -0.003)          |
| <b>6.0</b>                          | 0.300 (0.257, 0.374)       | 0.308 (0.269, 0.380)          | -0.008 (-0.022, -0.002)          |

^ The 95% confidence intervals for all NRI data derive from the bootstrap (1000 replications).

*Interpretive example:* At higher risk thresholds, significant reclassification of critical illness risk was observed when including even a weak biomarker in a clinical risk model (OR 2.0, NRI=0.072 (95%CI: 0.030, 0.126)). However, reclassification of controls was not improved using a biomarker at these risk thresholds.
