# Supplementary material
Source: PubMed Central journal article supplement (PMC3707977)
Supplement: NIHMS428098-supplement-09.pdf [file NIHMS428098-supplement-09.pdf]

**Table E2.** Example of a reclassification table comparing the clinical model to a model enhanced with a biomarker of moderate strength (OR 3.0). Panel A corresponds to cases (critical illness during hospitalization) and panel B corresponds to controls (no critical illness during hospitalization). *Dark grey* cells correspond to individuals with an increase in risk category for critical illness, while *light grey* are individuals classified in a lower risk category when adding the biomarker.

**A**

| Clinical model  | Model enhanced with biomarker |             |             | Total, N (%) |
|-----------------|-------------------------------|-------------|-------------|--------------|
|                 | 0 to 5%                       | 5 to 20%    | >20%        |              |
| 0 to 5%, N (%)  | 578                           | 306         | 4           | 888 (28.5)   |
| 5 to 20%, N (%) | 140                           | 886         | 348         | 1374 (44)    |
| > 20%, N (%)    | 0                             | 83          | 776         | 859 (27.5)   |
| Total, N (%)    | 718 (23)                      | 1275 (40.9) | 1128 (36.1) | 3,121        |

**B**

| Clinical model  | Model enhanced with biomarker |               |             | Total, N (%)  |
|-----------------|-------------------------------|---------------|-------------|---------------|
|                 | 0 to 5%                       | 5 to 20%      | >20%        |               |
| 0 to 5%, N (%)  | 36,712                        | 4,139         | 49          | 40,900 (75)   |
| 5 to 20%, N (%) | 4,712                         | 6,421         | 816         | 11,949 (21.9) |
| > 20%, N (%)    | 30                            | 584           | 1,063       | 1,677 (3.1)   |
| Total, N (%)    | 41,454 (76)                   | 11,144 (20.4) | 1,928 (3.5) | 54,526        |
